# Supplementary material for: Grammatical gender assignment in L3 versus L4 Swedish: a pseudo-longitudinal study
Source: publisher site journal article supplement (doi:10.1515/iral-2022-0207), 2023-06-02
Supplement: Supplementary file 1 [file j_iral-2022-0207_suppl_001.docx]

**Supplementary Material**

Nouns used in the experiment

| **Noun** | **Condition*** | **No. of letters** | **Cognateness with German** | **Cognateness with English** | **Cognateness with Polish** | **Frequency** |
| --- | --- | --- | --- | --- | --- | --- |
| natt | CU | 4 | 60 | 40 | 25 | 122 |
| metod | CU | 5 | 72 | 84 | 84 | 118 |
| teknik | CU | 6 | 72 | 45 | 63 | 115 |
| växt | CU | 4 | 0 | 20 | 0 | 107 |
| konst | CU | 5 | 80 | 20 | 0 | 78 |
| färg | CU | 4 | 40 | 0 | 40 | 75 |
| maskin | CU | 6 | 63 | 58 | 58 | 33 |
| lök | CU | 3 | 0 | 0 | 0 | 6 |
| korv | CU | 4 | 20 | 0 | 13 | 8 |
| grädde | CU | 6 | 17 | 17 | 0 | 5 |
| skog | CU | 4 | 0 | 0 | 0 | 77 |
| karaktär | CU | 8 | 67 | 56 | 56 | 66 |
| titel | CU | 5 | 100 | 60 | 40 | 56 |
| sko | CU | 3 | 20 | 5 | 0 | 33 |
| sten | CU | 4 | 80 | 0 | 17 | 27 |
| fjäril | CU | 6 | 16 | 23 | 17 | 4 |
| värk | CU | 4 | 15 | 0 | 0 | 8 |
| svamp | CU | 5 | 0 | 13 | 0 | 8 |
| skärm | CU | 5 | 50 | 17 | 20 | 14 |
| ost | CU | 3 | 25 | 17 | 0 | 66 |
| intresse | CN | 8 | 89 | 63 | 47 | 197 |
| djur | CN | 4 | 25 | 0 | 15 | 109 |
| hav | CN | 3 | 0 | 0 | 0 | 83 |
| fönster | CN | 7 | 86 | 15 | 15 | 43 |
| öra | CN | 3 | 0 | 0 | 0 | 35 |
| fält | CN | 4 | 50 | 40 | 25 | 31 |
| konto | CN | 5 | 100 | 29 | 100 | 26 |
| knä | CN | 3 | 50 | 50 | 34 | 24 |
| hjul | CN | 4 | 0 | 17 | 0 | 13 |
| ljus | CN | 4 | 20 | 20 | 0 | 84 |
| spel | L1IN | 4 | 80 | 0 | 0 | 156 |
| kön | L1IN | 3 | 0 | 0 | 0 | 49 |
| äventyr | L1IN | 7 | 45 | 56 | 0 | 22 |
| bad | L1IN | 3 | 100 | 25 | 13 | 15 |
| ansikte | L1IN | 7 | 29 | 15 | 0 | 66 |
| medel | L1IN | 5 | 50 | 50 | 34 | 93 |
| fartyg | L1IN | 6 | 0 | 0 | 17 | 47 |
| slott | L1IN | 5 | 43 | 17 | 0 | 26 |
| bröd | L1IN | 4 | 50 | 60 | 0 | 48 |
| fordon | L1IN | 6 | 25 | 0 | 17 | 25 |

*Note. CU = congruent-uter, CN = congruent-neuter, L1IN = L1-incongruent-neuter

Pairwise comparisons using the Bonferroni test for Accuracy
(Group × Year of Studies)

| **Comparison** | | | | | | | | | |  | | | | | | | |
| --- | --- | --- | --- | --- | --- | --- | --- | --- | --- | --- | --- | --- | --- | --- | --- | --- | --- |
| **Group** | | **Year of Studies** | |  | | **Group** | | **Year of Studies** | | **exp(B)** | | **SE** | | **z** | | **pbonferroni** | |
| L3S students |  | 3rd/4th |  | - |  | L4S students |  | 3rd/4th |  | 0.983 |  | 0.1359 |  | -0.124 |  | 1.000 |  |
| L3S students |  | 1st |  | - |  | L3S students |  | 3rd/4th |  | 0.344 |  | 0.0422 |  | -8.698 |  | < .001 |  |
| L3S students |  | 1st |  | - |  | L3S students |  | 2nd |  | 0.691 |  | 0.0782 |  | -3.265 |  | 0.016 |  |
| L3S students |  | 1st |  | - |  | L4S students |  | 3rd/4th |  | 0.338 |  | 0.0429 |  | -8.555 |  | < .001 |  |
| L3S students |  | 1st |  | - |  | L4S students |  | 1st |  | 1.297 |  | 0.1507 |  | 2.234 |  | 0.382 |  |
| L3S students |  | 1st |  | - |  | L4S students |  | 2nd |  | 0.524 |  | 0.0649 |  | -5.218 |  | < .001 |  |
| L3S students |  | 2nd |  | - |  | L3S students |  | 3rd/4th |  | 0.498 |  | 0.0628 |  | -5.529 |  | < .001 |  |
| L3S students |  | 2nd |  | - |  | L4S students |  | 3rd/4th |  | 0.489 |  | 0.0637 |  | -5.493 |  | < .001 |  |
| L3S students |  | 2nd |  | - |  | L4S students |  | 2nd |  | 0.759 |  | 0.0954 |  | -2.196 |  | 0.422 |  |
| L4S students |  | 1st |  | - |  | L3S students |  | 3rd/4th |  | 0.265 |  | 0.0344 |  | -10.232 |  | < .001 |  |
| L4S students |  | 1st |  | - |  | L3S students |  | 2nd |  | 0.533 |  | 0.0643 |  | -5.213 |  | < .001 |  |
| L4S students |  | 1st |  | - |  | L4S students |  | 3rd/4th |  | 0.261 |  | 0.0348 |  | -10.067 |  | < .001 |  |
| L4S students |  | 1st |  | - |  | L4S students |  | 2nd |  | 0.404 |  | 0.0528 |  | -6.929 |  | < .001 |  |
| L4S students |  | 2nd |  | - |  | L3S students |  | 3rd/4th |  | 0.656 |  | 0.0891 |  | -3.103 |  | 0.029 |  |
| L4S students |  | 2nd |  | - |  | L4S students |  | 3rd/4th |  | 0.645 |  | 0.0899 |  | -3.144 |  | 0.025 |  |
|  | | | | | | | | | | | | | | | | | |

Pairwise comparisons using the Bonferroni test for Accuracy
(Condition × Year of Studies)

| **Comparison** | | | | | | | | | |  | | | | | | | |
| --- | --- | --- | --- | --- | --- | --- | --- | --- | --- | --- | --- | --- | --- | --- | --- | --- | --- |
| **Condition** | | **Year of Studies** | |  | | **Condition** | | **Year of Studies** | | **exp(B)** | | **SE** | | **z** | | **pbonferroni** | |
| congruent-neuter |  | 3rd/4th |  | - |  | L1-incongruent-neuter |  | 3rd/4th |  | 1.3282 |  | 0.2271 |  | 1.6604 |  | 1.000 |  |
| congruent-neuter |  | 3rd/4th |  | - |  | congruent-uter |  | 3rd/4th |  | 0.4626 |  | 0.0797 |  | -4.4742 |  | < .001 |  |
| congruent-neuter |  | 1st |  | - |  | congruent-neuter |  | 3rd/4th |  | 0.3305 |  | 0.0545 |  | -6.7147 |  | < .001 |  |
| congruent-neuter |  | 1st |  | - |  | congruent-neuter |  | 2nd |  | 0.4446 |  | 0.0724 |  | -4.9787 |  | < .001 |  |
| congruent-neuter |  | 1st |  | - |  | L1-incongruent-neuter |  | 3rd/4th |  | 0.4389 |  | 0.0691 |  | -5.2333 |  | < .001 |  |
| congruent-neuter |  | 1st |  | - |  | L1-incongruent-neuter |  | 1st |  | 2.0641 |  | 0.3115 |  | 4.8022 |  | < .001 |  |
| congruent-neuter |  | 1st |  | - |  | L1-incongruent-neuter |  | 2nd |  | 0.8353 |  | 0.1287 |  | -1.1680 |  | 1.000 |  |
| congruent-neuter |  | 1st |  | - |  | congruent-uter |  | 3rd/4th |  | 0.1529 |  | 0.0243 |  | -11.8253 |  | < .001 |  |
| congruent-neuter |  | 1st |  | - |  | congruent-uter |  | 1st |  | 0.3992 |  | 0.0554 |  | -6.6165 |  | < .001 |  |
| congruent-neuter |  | 1st |  | - |  | congruent-uter |  | 2nd |  | 0.3278 |  | 0.0468 |  | -7.8050 |  | < .001 |  |
| congruent-neuter |  | 2nd |  | - |  | congruent-neuter |  | 3rd/4th |  | 0.7433 |  | 0.1309 |  | -1.6848 |  | 1.000 |  |
| congruent-neuter |  | 2nd |  | - |  | L1-incongruent-neuter |  | 3rd/4th |  | 0.9873 |  | 0.1669 |  | -0.0757 |  | 1.000 |  |
| congruent-neuter |  | 2nd |  | - |  | L1-incongruent-neuter |  | 2nd |  | 1.8790 |  | 0.3108 |  | 3.8132 |  | 0.005 |  |
| congruent-neuter |  | 2nd |  | - |  | congruent-uter |  | 3rd/4th |  | 0.3438 |  | 0.0586 |  | -6.2656 |  | < .001 |  |
| congruent-neuter |  | 2nd |  | - |  | congruent-uter |  | 2nd |  | 0.7374 |  | 0.1142 |  | -1.9661 |  | 1.000 |  |
| L1-incongruent-neuter |  | 3rd/4th |  | - |  | congruent-uter |  | 3rd/4th |  | 0.3483 |  | 0.0575 |  | -6.3903 |  | < .001 |  |
| L1-incongruent-neuter |  | 1st |  | - |  | congruent-neuter |  | 3rd/4th |  | 0.1601 |  | 0.0265 |  | -11.0627 |  | < .001 |  |
| L1-incongruent-neuter |  | 1st |  | - |  | congruent-neuter |  | 2nd |  | 0.2154 |  | 0.0352 |  | -9.3889 |  | < .001 |  |
| L1-incongruent-neuter |  | 1st |  | - |  | L1-incongruent-neuter |  | 3rd/4th |  | 0.2126 |  | 0.0336 |  | -9.7936 |  | < .001 |  |
| L1-incongruent-neuter |  | 1st |  | - |  | L1-incongruent-neuter |  | 2nd |  | 0.4047 |  | 0.0626 |  | -5.8447 |  | < .001 |  |
| L1-incongruent-neuter |  | 1st |  | - |  | congruent-uter |  | 3rd/4th |  | 0.0741 |  | 0.0118 |  | -16.3140 |  | < .001 |  |
| L1-incongruent-neuter |  | 1st |  | - |  | congruent-uter |  | 1st |  | 0.1934 |  | 0.0270 |  | -11.7692 |  | < .001 |  |
| L1-incongruent-neuter |  | 1st |  | - |  | congruent-uter |  | 2nd |  | 0.1588 |  | 0.0228 |  | -12.8051 |  | < .001 |  |
| L1-incongruent-neuter |  | 2nd |  | - |  | congruent-neuter |  | 3rd/4th |  | 0.3956 |  | 0.0664 |  | -5.5214 |  | < .001 |  |
| L1-incongruent-neuter |  | 2nd |  | - |  | L1-incongruent-neuter |  | 3rd/4th |  | 0.5254 |  | 0.0844 |  | -4.0084 |  | 0.002 |  |
| L1-incongruent-neuter |  | 2nd |  | - |  | congruent-uter |  | 3rd/4th |  | 0.1830 |  | 0.0296 |  | -10.4834 |  | < .001 |  |
| L1-incongruent-neuter |  | 2nd |  | - |  | congruent-uter |  | 2nd |  | 0.3925 |  | 0.0572 |  | -6.4188 |  | < .001 |  |
| congruent-uter |  | 1st |  | - |  | congruent-neuter |  | 3rd/4th |  | 0.8278 |  | 0.1278 |  | -1.2240 |  | 1.000 |  |
| congruent-uter |  | 1st |  | - |  | congruent-neuter |  | 2nd |  | 1.1137 |  | 0.1694 |  | 0.7077 |  | 1.000 |  |
| congruent-uter |  | 1st |  | - |  | L1-incongruent-neuter |  | 3rd/4th |  | 1.0995 |  | 0.1608 |  | 0.6487 |  | 1.000 |  |
| congruent-uter |  | 1st |  | - |  | L1-incongruent-neuter |  | 2nd |  | 2.0926 |  | 0.2986 |  | 5.1748 |  | < .001 |  |
| congruent-uter |  | 1st |  | - |  | Congruent-uter |  | 3rd/4th |  | 0.3829 |  | 0.0566 |  | -6.4917 |  | < .001 |  |
| congruent-uter |  | 1st |  | - |  | congruent-uter |  | 2nd |  | 0.8213 |  | 0.1072 |  | -1.5078 |  | 1.000 |  |
| congruent-uter |  | 2nd |  | - |  | congruent-neuter |  | 3rd/4th |  | 1.0080 |  | 0.1591 |  | 0.0503 |  | 1.000 |  |
| congruent-uter |  | 2nd |  | - |  | L1-incongruent-neuter |  | 3rd/4th |  | 1.3388 |  | 0.2007 |  | 1.9466 |  | 1.000 |  |
| congruent-uter |  | 2nd |  | - |  | congruent-uter |  | 3rd/4th |  | 0.4663 |  | 0.0706 |  | -5.0382 |  | < .001 |  |
|  | | | | | | | | | | | | | | | | | |

Pairwise comparisons using the Bonferroni test for RTs
(Group × Year of Studies)

| **Comparison** | | | | | | | | | |  | | | | | | | |
| --- | --- | --- | --- | --- | --- | --- | --- | --- | --- | --- | --- | --- | --- | --- | --- | --- | --- |
| **Group** | | **Year of Studies** | |  | | **Group** | | **Year of Studies** | | **Difference** | | **SE** | | **z** | | **pbonferroni** | |
| L3S students |  | 3rd/4th |  | - |  | L4S students |  | 3rd/4th |  | -41.96 |  | 14.3 |  | -2.939 |  | 1.000 |  |
| L3S students |  | 1st |  | - |  | L3S students |  | 3rd/4th |  | 292.20 |  | 19.0 |  | 15.340 |  | < .001 |  |
| L3S students |  | 1st |  | - |  | L3S students |  | 2nd |  | 138.53 |  | 21.1 |  | 6.560 |  | < .001 |  |
| L3S students |  | 1st |  | - |  | L4S students |  | 3rd/4th |  | 250.24 |  | 19.5 |  | 12.811 |  | < .001 |  |
| L3S students |  | 1st |  | - |  | L4S students |  | 1st |  | 68.12 |  | 22.3 |  | 3.050 |  | 0.034 |  |
| L3S students |  | 1st |  | - |  | L4S students |  | 2nd |  | 147.00 |  | 21.5 |  | 6.844 |  | < .001 |  |
| L3S students |  | 2nd |  | - |  | L3S students |  | 3rd/4th |  | 153.67 |  | 17.1 |  | 9.013 |  | < .001 |  |
| L3S students |  | 2nd |  | - |  | L4S students |  | 3rd/4th |  | 111.71 |  | 17.6 |  | 6.350 |  | < .001 |  |
| L3S students |  | 2nd |  | - |  | L4S students |  | 2nd |  | 8.47 |  | 18.8 |  | 0.450 |  | 1.000 |  |
| L4S students |  | 1st |  | - |  | L3S students |  | 3rd/4th |  | 224.08 |  | 21.4 |  | 10.450 |  | < .001 |  |
| L4S students |  | 1st |  | - |  | L3S students |  | 2nd |  | 70.41 |  | 23.3 |  | 3.021 |  | 0.038 |  |
| L4S students |  | 1st |  | - |  | L4S students |  | 3rd/4th |  | 182.12 |  | 21.9 |  | 8.325 |  | < .001 |  |
| L4S students |  | 1st |  | - |  | L4S students |  | 2nd |  | 78.87 |  | 23.6 |  | 3.338 |  | 0.013 |  |
| L4S students |  | 2nd |  | - |  | L3S students |  | 3rd/4th |  | 145.20 |  | 17.5 |  | 8.300 |  | < .001 |  |
| L4S students |  | 2nd |  | - |  | L4S students |  | 3rd/4th |  | 103.24 |  | 18.0 |  | 5.729 |  | < .001 |  |
|  | | | | | | | | | | | | | | | | | |
